# Supplementary material
Source: Springer Nature journal article supplement (https://www.springermedizin.de/resource/supplementary/12891_2010_1132_MOESM1_ESM.pdf/9507210)

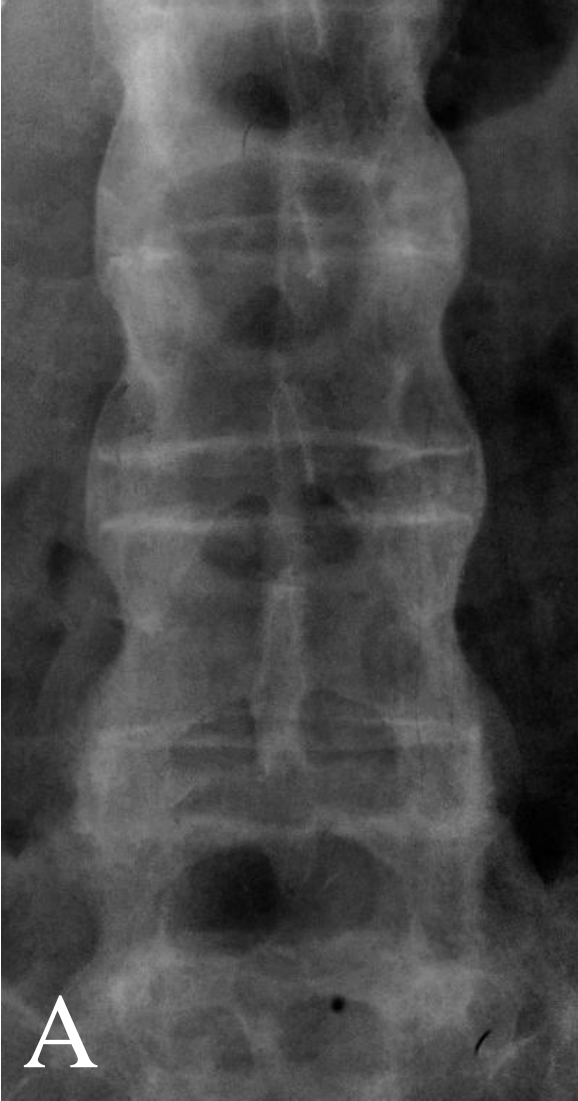

A

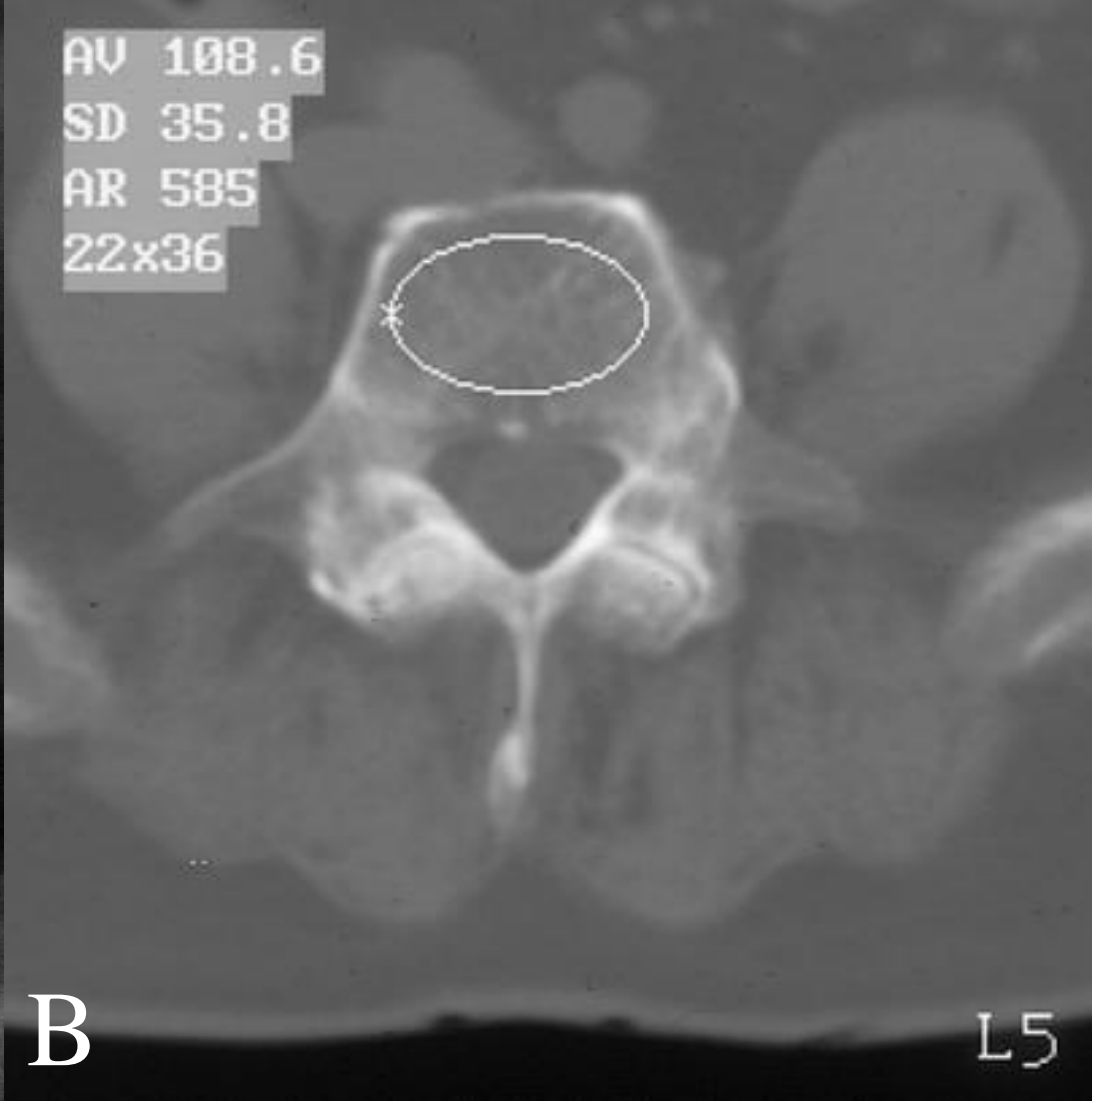

B

L5

Supplement: MOESM1 [file 9507210]
